# Supplementary material for: Biosynthesis of the oxygenated diterpene nezukol in the medicinal plant Isodon rubescens is catalyzed by a pair of diterpene synthases
Source: PLOS journal article supplement (doi:10.1371/journal.pone.0176507), 2017-04-26

S2 Fig. Nezukol 1D selective NOE spectra of Me-20 and Me-17.

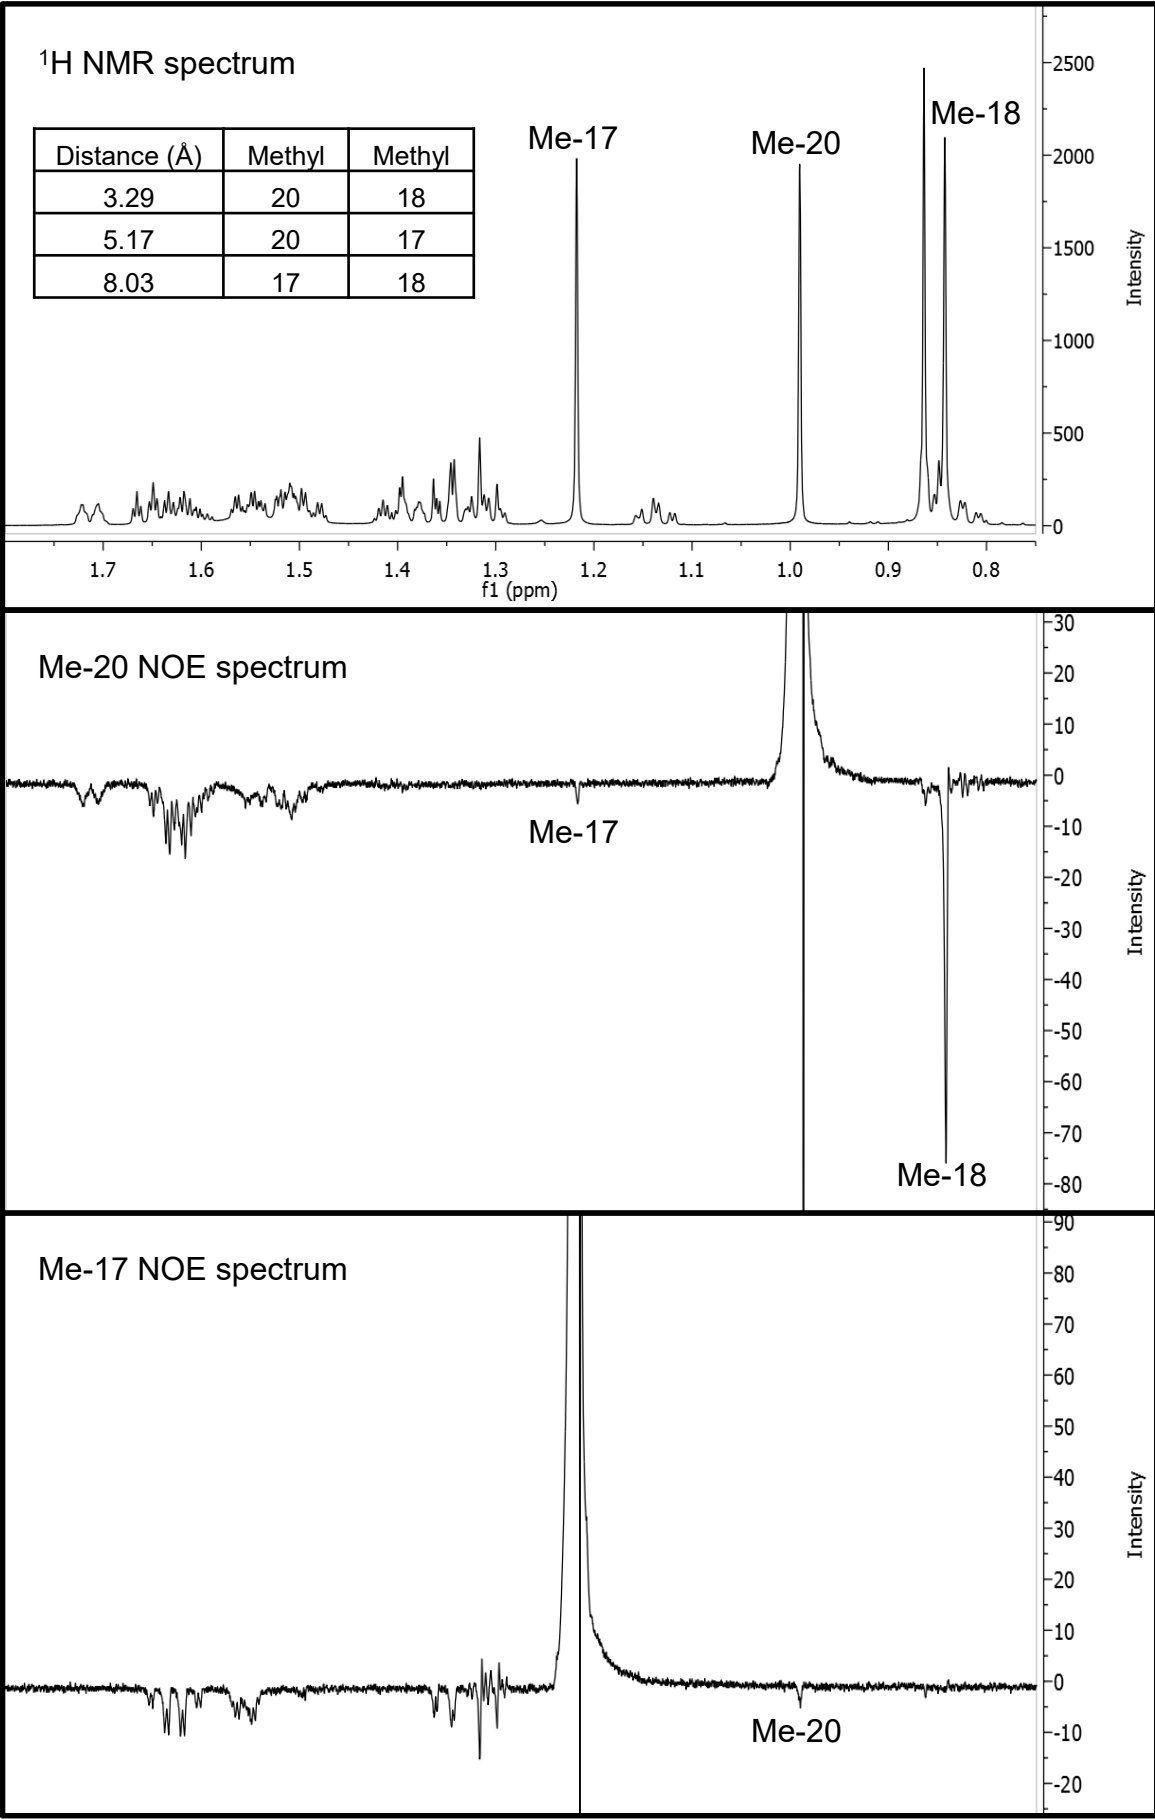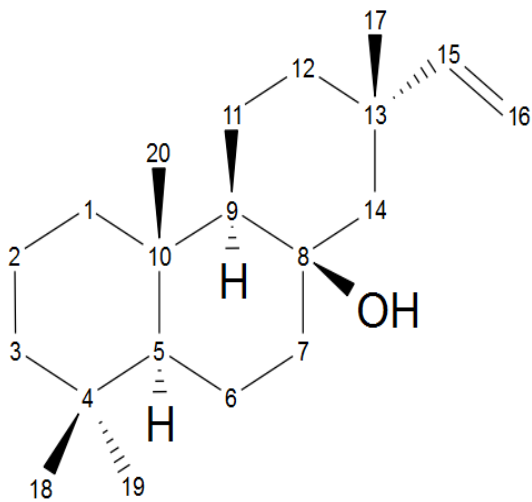

Supplement: S4 (10.1371/journal.pone.0176507.s004) [file journal.pone.0176507.s004]
